# Supplementary material
Source: Research Square preprint supplement (doi:10.21203/rs.3.rs-8713144/v1)
Supplement: Supplementary file 1 [file 4e8fa6faf066091690a6c679.docx]

**Supplementary Table 1**. Association of RTL ratios with the duration of the corticosteroid theraphy and clinically most relevant covariates. **Statistics**: Associations were calculated using Generalized Linear Models (GLM) with a gamma distribution. Significant differences are shown in bold. **Abbreviations:** AMR, arithmetic mean ratio; 95%CI, 95% of confidence interval; BMI, body mass index, MSI, modified shock index; p, level of significance; RTL, relative telomere length; SI, shock index, SOFA, sequential organ failure assessment.

|  | **AMR (IC2.5- IC97.5)** | **p-value** |
| --- | --- | --- |
| **Age** | 0.99 (0.98-1.02) | 0.914 |
| **Asthma** | 0.72 (0.25-2.08) | 0.548 |
| **BMI (baseline)** | 1.03 (1.01-1.05) | **0.023** |
| **BMI (follow-up)** | 1.028 (0.99-1.06) | 0.071 |
| **Chronic lung disease** | 1.03 (0.66-1.6) | 0.902 |
| **Dexamethasone equivalent dose** | 1.004 (1.003143-1.004914) | **<0.001** |
| **Duration of IMV** | 1.02 (1.01-1.03) | **0.003** |
| **Follow-up visit** | 0.95 (0.88-1.02) | 0.165 |
| **Gender** | 0.84 (0.60-1.18) | 0.324 |
| **ICU LOS** | 1.02 (1.01-1.03) | **<0.001** |
| **Inotropic/vasopressor therapy** | 1.86 (1.40-2.46) | **<0.001** |
| **MSI** | 1.24 (0.60- 2.54) | 0.561 |
| **RTL quantification batch** | 1.06 (0.95-1.19) | 0.287 |
| **SI** | 1.41 (0.49-4.05) | 0.525 |
| **Smoker status** | 1.17 (0.99-1.38) | 0.069 |
| **SOFA score** | 1.03 (0.98-1.07) | 0.225 |

**Supplementary table 2**. Association of RTL ratios with the duration of corticosteroid therapy and clinically most relevant covariates. **Statistics**: Associations were calculated using Generalized Linear Models (GLM) with a gamma distribution. Significant differences are shown in bold. **Abbreviations:** AMR, arithmetic mean ratio; 95%CI, 95% of confidence interval; BMI, body mass index, MSI, modified shock index; p, level of significance; RTL, relative telomere length; SI, shock index, SOFA, sequential organ failure assessment.

|  | **AMR (IC2.5- IC97.5)** | **p-value** |
| --- | --- | --- |
| **Age** | 0.99 (0.97-1.02) | 0.797 |
| **Asthma** | 0.55 (0.08-3.53) | 0.532 |
| **BMI (baseline)** | 1.04 (1.01-1.08)1 | 0.055 |
| **BMI (follow-up)** | 1.03 (0.98-1.01) | 0.284 |
| **Chronic lung disease** | 1.41 (0.67-2.94) | 0.366 |
| **Duration of IMV** | 1.03 (1.01-1.05) | **0.001** |
| **Follow-up visit** | 0.92 (0.81-1.04) | 0.193 |
| **Gender** | 0.76 (0.43-1.35) | 0.355 |
| **ICU LOS** | 1.03 (1.01-1.04) | **<0.001** |
| **Inotropic/vasopressor therapy** | 2.14 (1.18-3.88) | **0.015** |
| **MSI** | 1.08 (0.43-2.71) | 0.865 |
| **RTL quantification batch** | 1.13 (0.94-1.36) | 0.192 |
| **SI** | 1.20 (0.31-4.59) | 0.792 |
| **Smoker status** | 1.31 (1.01-1.69) | **0.048** |
| **SOFA score** | 1.05881 | 0.107 |
